# Supplementary material
Source: PubMed Central journal article supplement (PMC2851947)
Supplement: 1002447107_pnas.201002447SI.pdf [file 1002447107_pnas.201002447SI.pdf]

# Supporting Information

Lunardi et al. 10.1073/pnas.1002447107

## SI Methods

**IVEC Procedure. Production and purification of MBP-Dmp53.** The ORF of *Drosophila* p53 (NM\_206545) was cloned in a modified version of the pFastBac baculovirus expression vector, in frame with maltose binding protein (MBP) at the N terminus (pFB6-MBP-Dmp53). Baculovirus expressing MBP-Dmp53 (or MBP alone as a control) was prepared and used for protein production in Sf9 insect cells. MBP proteins were purified from baculovirus-infected Sf9 cells using amylose beads under nondenaturing conditions [lysis buffer: 20 mM Tris-HCl (pH 7.5), 200 mM NaCl, 1 mM EDTA (pH 8), 10 mM beta-mercaptoethanol]; after extensive washes, beads were used for in vitro pull-down experiments. We observed that best results were obtained using fresh preparations of MBP-Dmp53 and MBP proteins, so each round of pull-down experiments was performed with a different batch of recombinant proteins.

**Preparation of small pools.** We prepared pools of 24 clones corresponding to single rows of 384-well plates. For the DGC1.0 library, we purified plasmid DNA from mixed bacterial cultures. For the DGC2.0 library, we purified DNA from individual clones using 96-well format minipreps and made pools by mixing plasmid preparations. This procedure required a greater effort in the preparation phase, but greatly facilitated retrieval of positive clones during sib selection.

**In vitro pull-down.** Radiolabeled proteins were obtained from DNA pools by in vitro transcription–translation in the presence of [<sup>35</sup>S] methionine, using rabbit reticulocyte lysates (TnT; Promega) and appropriate RNA polymerases. Plates 1–4 of DGC1.0 are cloned in pBluescript vectors and translate with poor efficiency. To overcome this problem, we used primers with vector sequences to amplify the inserts by PCR, the upper primer containing a T7 RNA polymerase promoter for in vitro transcription, exactly as described by others (1).

PCR products were directly used as templates for coupled in vitro transcription–translation. Plates 1–8 of DGC2.0 are cloned in pFLC vectors and do not translate efficiently in reticulocyte lysates. Expression of these clones was not improved by a PCR-based approach, so they had to be excluded from this study.

Radiolabeled proteins were added to small aliquots of recombinant MBP-Dmp53 bound to amylose beads. After a 1 h incubation in pull-down buffer [50 mM Tris-HCl (pH 7.5), 150 mM NaCl, 0.1% Nonidet P-40, 5% glycerol, protease inhibitors (Sigma), 1 mM PMSF, 5 mM NaF, 1 mM beta-glycerolphosphate], the reactions were transferred to plastic minifilters (Wizard Minicolumn; Promega) mounted on a vacuum manifold, and the beads were washed by passing a large volume of pull-down buffer through the column. Bound proteins were eluted with hot Laemmli sample buffer by briefly centrifuging the filters on top of 1.5-mL tubes. Eluted proteins were analyzed by SDS/PAGE followed by autoradiography.

**Bioinformatics and Statistical Analysis. Data compilation.** The list of literature-curated *Drosophila* p53 interactions (LCDI) includes proteins with at least one experimental evidence of physical interaction with Dmp53 and excludes phenotypic and functional associations. It was compiled by searching a number of protein–protein interaction databases: BioGrid, MINT, DroID, IntAct, BIND, and HPRD. It also contains additional physical interactions involving Dmp53 described in the literature. The data included in the LCDI dataset were last updated on February 27, 2009. Human orthologs were defined according to Homologene and Inparanoid databases (<http://inparanoid.sbc.su.se/>). For genes

lacking a human ortholog in these databases, we performed BLAST analysis vs. human protein sequences and focused our attention on hits with a significant similarity score. We used the BLASTO interface (<http://oxytricha.princeton.edu/BlastO/>) to compare peptide sequences vs. clusters of eukaryotic orthologous groups (NCBI\_KOG and MultiParanoid) (2). Finally, we employed TreeFam (<http://www.treefam.org/>) to construct phylogenetic trees of putative ortholog groups. In some cases, humans have more than one gene with significant similarity to a single *Drosophila* gene: if the human genes are phylogenetically related to each other (i.e., paralogs) they were all considered orthologs (e.g., *Drosophila Imp* vs. human IGFBP1, IGFBP2, and IGFBP3). In other cases, *Drosophila* has two or more paralogs with significant similarity to a single human gene (e.g., *Drosophila eyeless* and *twi-of-eyeless* vs. human Pax6): In such instances, the human gene was considered an ortholog to both. In some cases we detected strong similarity only within a specific domain of the protein, with poor conservation along the remaining peptide sequence. In those instances, we considered them orthologs only if the two proteins scored as reciprocal best matches in BLAST analysis.

**Overrepresentation analysis.** Overrepresentation analysis of Gene Ontology and phenotypes among the interactors was performed using Fisher's exact test. The background populations are the lists of all fly genes represented in the DGC 1.0 and 2.0 libraries (6,607 FlyBase IDs). Gene Ontology and phenotype annotations were obtained from FlyBase. For both Gene Ontology and phenotype annotation we took into account the hierarchical nature of the annotation ontologies by assigning to each gene all of the annotation terms that are ancestors in the ontology of the terms that are directly assigned to the gene. To avoid very generic GO terms the analysis was limited to terms with a total prevalence <2,000 in the background population.

**Relevance to cancer.** We analyzed publicly available breast cancer gene expression datasets to determine which of the functionally validated human interactors have prognostic predictive power. The datasets analyzed are as follows:

NKI: Described in ref. 3. Normalized expression data and clinical data were obtained from the paper's website (<http://www.rii.com/publications/2002/nejm.html>).

Miller (4): Normalized expression data and clinical data were obtained from the Gene Expression Omnibus (GEO) website (<http://www.ncbi.nlm.nih.gov/projects/geo/>) under accession GSE3494.

Pawitan (5): Normalized expression data and clinical data were obtained from GEO under accession GSE1456.

We considered only probesets associated unambiguously with one of the functionally validated human interactors by the annotation file provided by Affymetrix. For the NKI datasets, the mapping between accession numbers provided in the original dataset and Entrez Gene IDs was obtained through Unigene. We used univariate Cox analysis to determine significant ( $P \leq 0.05$ ) correlations between the logarithmic expression of each microarray probeset and patient survival. For GTPBP4 in p53-wild-type breast tumors we also compared the survival probabilities of high- and low-GTPBP4 tumors with a log-rank test. For this analysis the logarithmic expression levels of the two Affymetrix probes associated with GTPBP4 were averaged.

**Databases.** Databases used were as follows: FlyBase release 2008\_05; BioGrid release 2.0.45; DroID version 4.0; Homologene version 62, released June 12, 2008; Inparanoid version 6.0, released August

2007; NCBI\_KOG release 2003; MultiParanoid release 2006; TreeFam version 6.0, released June 6, 2008; Entrez Gene, downloaded 26 October 2008; Gene Ontology release 20081012; Affymetrix HGU133 annotations, version 26; and Unigene, *Homo sapiens* build 216.

**Cell Culture and Transfection Methods.** SF9 insect cells were cultured at 27 °C in SF900II medium (Gibco) supplemented with 10% FBS and gentamycin (10 µg/mL). HEK293T, HCT116, and U2OS mammalian cell lines were cultured in Dulbecco's modified Eagle's medium supplemented with 10% FBS, penicillin (100 units/mL), and streptomycin (100 µg/mL). Calcium phosphate was used for DNA transfection of HEK293T and U2OS. siRNAs were transfected using RNAiMAX and Lipofectamine 2000 reagent (Invitrogen).

**Quantification of Cell Viability Using WST-1.** Cell viability was assayed using the WST-1 reagent (Roche), according to the manufacturer's protocol. Absorbance was measured on a microplate ELISA reader (Envision Xcite; Perkin-Elmer) at a 450-nm detection wavelength. Normalized WST was calculated as follows: WST (%) = [(A<sub>450</sub> of treated sample - A<sub>450</sub> of blank)/(A<sub>450</sub> of untreated sample - A<sub>450</sub> of blank)] × 100. Blank represents wells containing culture medium only.

For any given siRNA pool, the difference in normalized WST between untreated and drug-treated cells [ $\Delta$ WST = WST(untreated) - WST(treated)] reflects the amplitude of the effect of p53 activation.  $\Delta$ WST values of cells transfected with interactor-specific siRNAs were compared to  $\Delta$ WST values of cells transfected with control siRNAs (two independent nontargeting siRNAs were used as controls). A greater  $\Delta$ WST indicates more efficient arrest, and a smaller  $\Delta$ WST indicates less efficient arrest. Differences were considered significant if they were >10 normalized WST units [i.e.,  $\Delta$ WST(interactor siRNA) -  $\Delta$ WST(control siRNA) > |10|].

**Real-Time RT-PCR.** Total RNA was isolated using the TRIZOL reagent (Invitrogen), following the manufacturer's instructions. Single-strand cDNA was obtained from 1 µg of purified RNA, using the iSCRIPT cDNA Synthesis Kit (Bio-Rad) according to manufacturer's instructions. Quantitative RT-PCR (qPCR) was performed using SYBR-Green PCR Master Mix (Applied Biosystems) and an iCycler IQ Real-time PCR System (Bio-Rad). Expression of the gene of interest was analyzed using specific oligonucleotides designed using the software Beacon Designer 2.0 (Premier Biosoft International). Primer sequences are available upon request. The annealing temperature of all of the primers described was 60 °C. The results were normalized to GAPDH and the initial amount of the template of each sample was determined as relative expression vs. that of one of the samples chosen as reference. The relative expression of each sample was calculated by the equation  $2^{-\Delta\Delta C_t}$  (User Bulletin 2 of the ABI Prism 7700 Sequence Detection System).

**Protein Interaction Studies. Expression vectors encoding MBP-fusion proteins.** For coaffinity purification assays, the MBP coding sequence from pMalC2x was PCR amplified and cloned in pcDNA3.1 expression vector, with a Kozak consensus for efficient translation in mammalian cells. The coding regions of human p53, Tap63alpha, and Tap73alpha were inserted in frame at the C terminus of MBP to generate the pcDNA3-MBP-p53, pcDNA3-MBP-p63, and pcDNA3-MBP-p73 plasmids.

**Coimmunoprecipitation.** Co-IP experiments with endogenous proteins were performed in HCT116 cell lines using co-AP buffer [50 mM Tris-HCl (pH 8), 150 mM NaCl, 1 mM EDTA (pH 8), 1 mM DTT, 5% glycerol, protease inhibitors (Sigma), 1 mM PMSF, 5 mM NaF, 1 mM beta-glycerolphosphate]. Samples were cleared by centrifugation for 30 min at 13,000 × g at 4 °C and incubated for 2 h at 4 °C with anti-p53 antibody (DO-1; Santa Cruz). After 1 h incubation with protein G-Sepharose (GE Healthcare), immunoprecipitates were washed three times in co-AP buffer, resuspended in sample buffer, and analyzed by immunoblotting. To avoid cross-reaction with Ig heavy chains, immunoprecipitated p53 was detected using rabbit polyclonal FL393 (Santa Cruz) followed by HRP-Protein A (Pierce). For Co-IP of overexpressed proteins, p53-null H1299 cells were transfected with appropriate expression vectors and processed 48 h later. Lysis was performed in co-AP buffer supplemented with phosphatase and protease inhibitors. Cleared lysates were incubated overnight with anti-GFP or anti-HA antibody covalently bound to Protein G-Sepharose (GE Healthcare), using 10 mg/mL dimethylpimelidate (Pierce). Immunoprecipitated proteins were separated by SDS/PAGE and analyzed by immunoblotting. Coimmunoprecipitated p53 was directly detected using HRP-conjugated DO-1 monoclonal antibody (Santa Cruz).

**In vitro pull-down using purified proteins.** The MBP and MBP-p53 baits were purified from H1299 cells transfected with the respective pcDNA3 expression vectors. Cells were lysed in co-AP buffer and MBP-fusion proteins were recovered on amylose beads (NEB).

For expression in bacteria, the coding region of human GTPBP4 was cloned in frame at the C terminus of GST in pGEX4T1. Recombinant GST and GST-GTPBP4 proteins were purified from BL21 after induction with 1 mM IPTG for 2 h at 37 °C. Bacteria were lysed in 50 mM Tris-HCl (pH 8.0), 300 mM NaCl, 0.1% Nonidet P-40, 0.1% Triton X-100, 0.1% Tween 20, 1 mM EDTA, plus 0.2 mg/mL lysozyme and protease inhibitors. After 30 min on ice, lysates were sonicated, clarified by centrifugation, and incubated with glutathione beads (GE Healthcare). After purification, GST and GST-GTPBP4 proteins were eluted with 10 mM reduced glutathione and used as prey for in vitro pull-down on MBP and MBP-p53 beads. After 1 h binding at 4 °C in co-AP buffer, beads were washed and bound proteins were analyzed by Western blot.

- Lee LA, et al. (2005) *Drosophila* genome-scale screen for PAN GU kinase substrates identifies Mat98Bb as a cell cycle regulator. *Dev Cell* 8:435-442.
- Zhou Y, Landweber LF (2007) BLASTO: A tool for searching orthologous groups. *Nucleic Acids Res* 35:W678-W682.
- van de Vijver MJ, et al. (2002) A gene-expression signature as a predictor of survival in breast cancer. *N Engl J Med* 347:1999-2009.

- Miller LD, et al. (2005) An expression signature for p53 status in human breast cancer predicts mutation status, transcriptional effects, and patient survival. *Proc Natl Acad Sci USA* 102:13550-13555.
- Pawitan Y, et al. (2005) Gene expression profiling spares early breast cancer patients from adjuvant therapy: Derived and validated in two population-based cohorts. *Breast Cancer Res* 7:R953-R964.

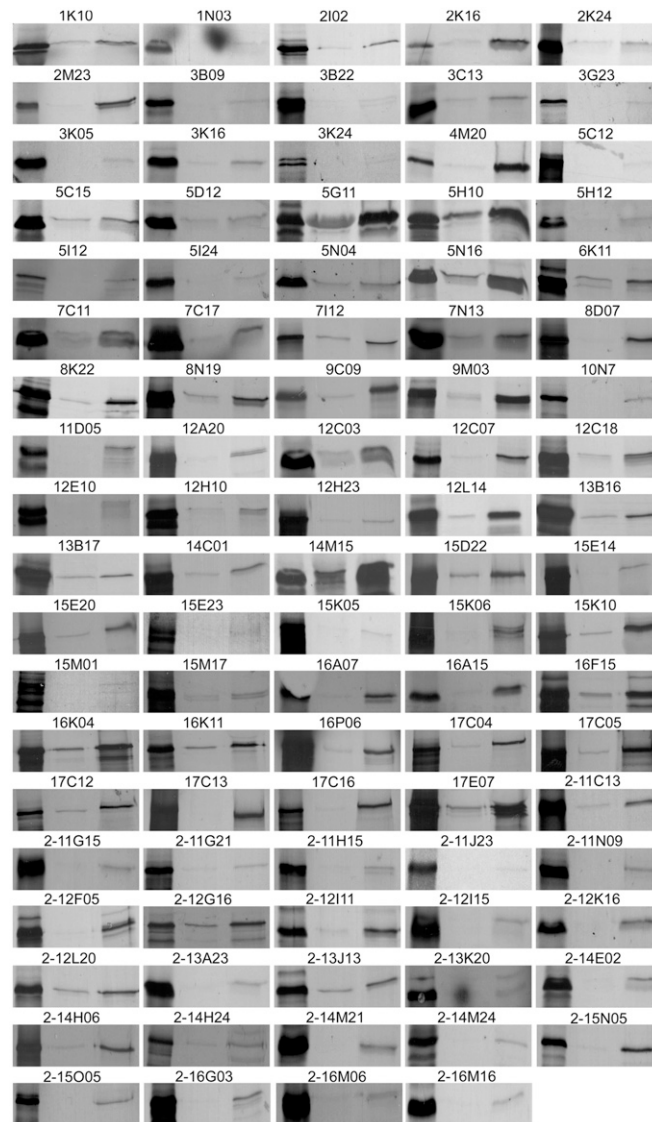

**Fig. S1.** In vitro pull-down experiments relative to the 94 cDNA hits identified during the screening. Each first lane is 1/40th of the input. Each second lane is the eluate of MBP beads. Each third lane is the eluate of MBP-Dmp53 beads. Numbers represent the position of each clone in 384-well plates of the DGC1.0 and DGC2.0 libraries. Clone 12L14 is Dmp53 (FBgn0039044). Clone 17E07 (LD46618P) is not annotated in FlyBase and corresponds to a "probable RNA-directed DNA polymerase from transposon BS." Identity of the *Drosophila* genes corresponding to all remaining clones can be found in [Table S1](#).

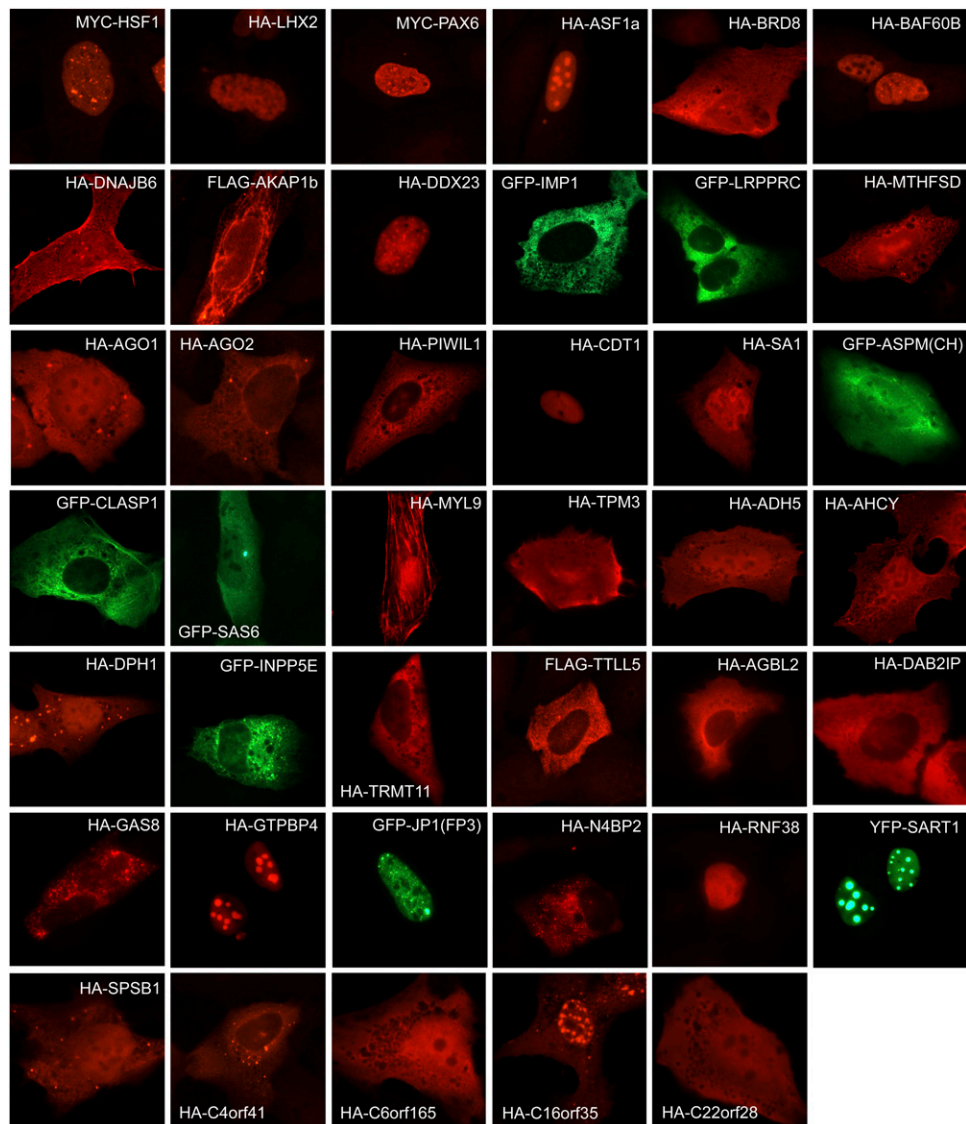

**Fig. S2.** Cellular localization of 41 mammalian orthologs of Dmp53 interacting proteins. Vectors expressing the indicated proteins were transiently transfected in U2OS cells. Localization of encoded proteins was analyzed by immunofluorescence after 24 h. Proteins were visualized using antibodies to specific epitope tags or by GFP as indicated.

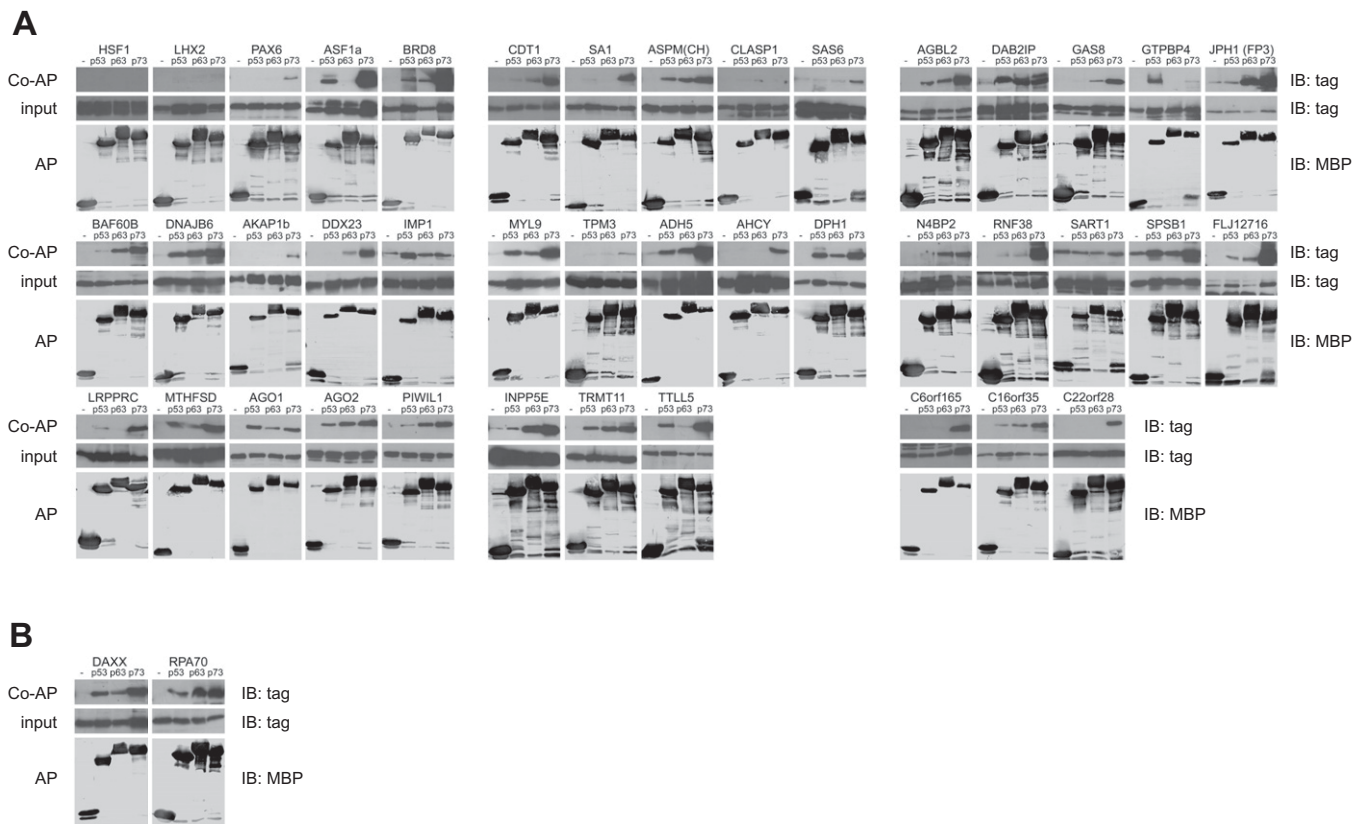

**Fig. S3.** Co-AP experiments relative to mammalian orthologs of Dmp53 interacting proteins. (A) Expression plasmids encoding tagged versions of the indicated proteins were cotransfected with pcDNA3-MBP, pcDNA3-MBP-p53, pcDNA3-MBP-TAp63a, or pcDNA3-MBP-TAp73a in 293T cells. After cell lysis, MBP fusion proteins (baits) were purified on amylose beads. Copurified proteins were detected by immunoblotting using antibodies to specific tags. (Top) Tagged prey proteins after affinity purification, demonstrating binding to the indicated MBP-tagged bait proteins or MBP alone as a control (-). (Middle) Expression of the tagged prey in the lysate (1/40th of the input). (Bottom) Expression of MBP-tagged bait proteins after affinity purification. Top and Middle are cropped from the same autoradiographic film (i.e., have the same exposure). (B) As proof of concept for sensibility and reliability of the assay, co-AP experiments using two human p53 interologs (Daxx and Rpa70) are also shown.

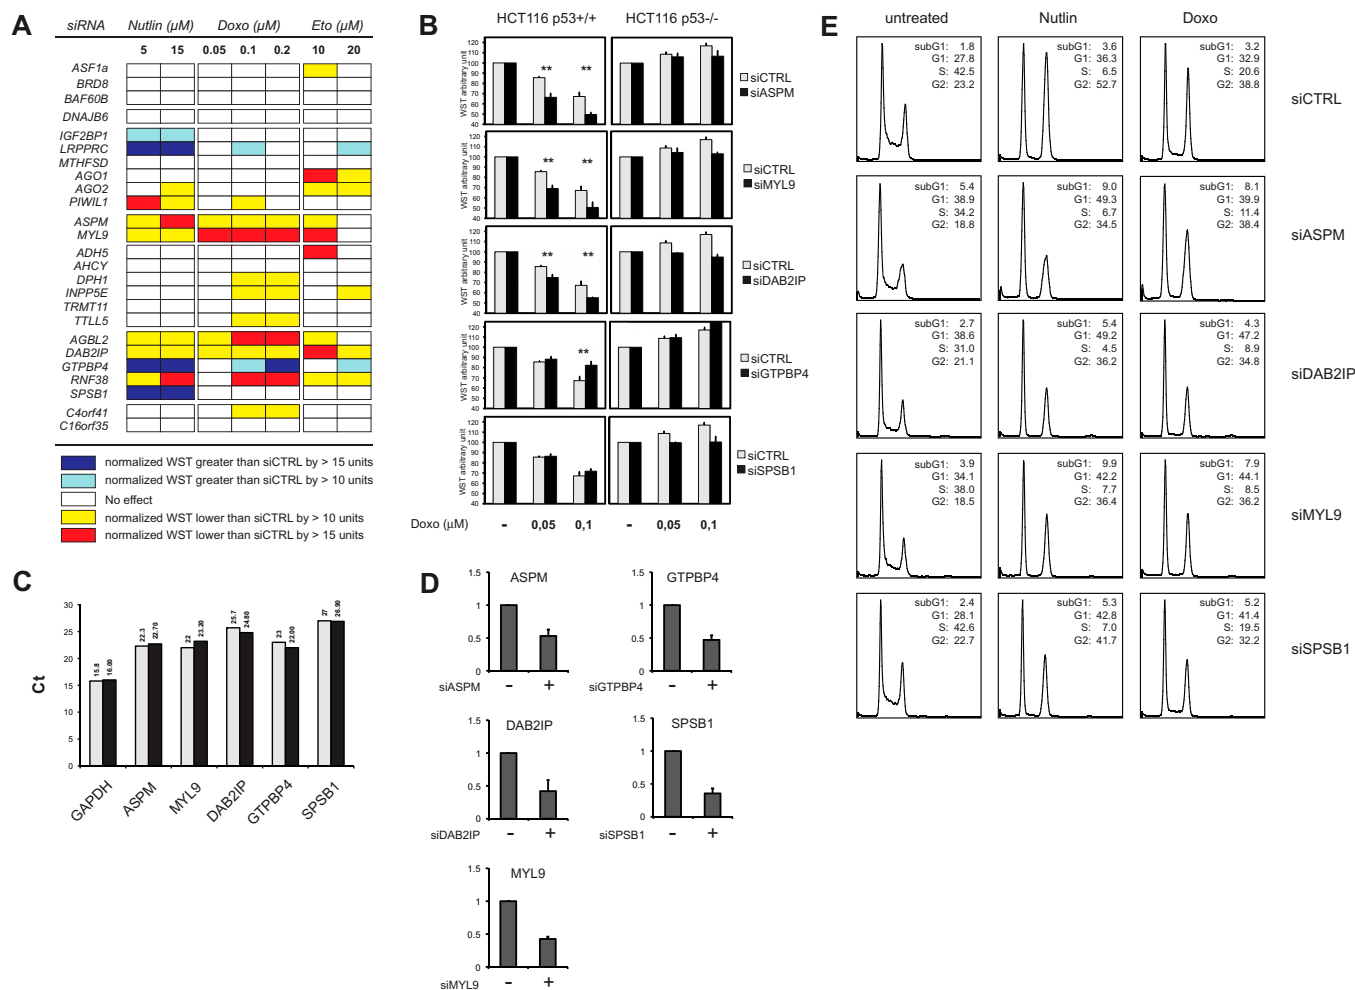

**Fig. S4.** Functional validation of p53 interactors by RNA-mediated interference. (A) Primary screening for modulators of p53-dependent growth inhibition. HCT116 cells bearing wild-type p53 (HCT116 WT) were transfected with control siRNA (siCTRL) or siRNA pools targeting each of 24 newly identified p53 interactants. Cell viability was measured by WST-1 after treatment with Nutlin-3, Doxorubicin, or Etoposide as indicated. The difference in normalized WST between untreated and treated samples ( $\Delta$ WST) was used to quantify the decrease in cell viability after p53 activation. For each gene-specific siRNA, this value was compared to that of control siRNA; differences in  $\Delta$ WST were considered significant only if reproducibly >10 normalized WST units (see *SI Methods* for details). (B) Transient knockdown of five unique p53 interactors affects the response of HCT116 cells to Doxorubicin. The experiment was performed as described in Fig. 3A. As a control for p53 dependency, the same experiment was performed in HCT116 p53<sup>-/-</sup> cells (\*,  $P < 0.05$ ; \*\*,  $P < 0.01$ ). (C) Functionally validated p53 interactors are expressed at comparable levels in HCT116 WT cells (gray bars) and HCT116 p53<sup>-/-</sup> cells (black bars). mRNA levels of the indicated genes were analyzed by RT-qPCR. A single representative experiment is reported. (D) All siRNA pools reduce the levels of target mRNAs to  $\leq 50\%$ . Expression levels of the five functionally validated p53 interactors were determined by RT-qPCR in HCT116 WT cells transfected with control or specific siRNA pools under the experimental conditions used for WST assays. Data are averages  $\pm$  SD. (E) Cell-cycle analysis of cells transiently transfected with siRNA pools targeting four different functional hits. HCT116 p53 WT cells were lipofected with the indicated siRNA pools, treated with Nutlin-3 (5 mM) or Doxorubicin (0.05 mM) for 24 h, stained with propidium iodide (PI), and analyzed by flow cytometry. The distribution (percentage) of cell-cycle phases was determined using FlowJo software.

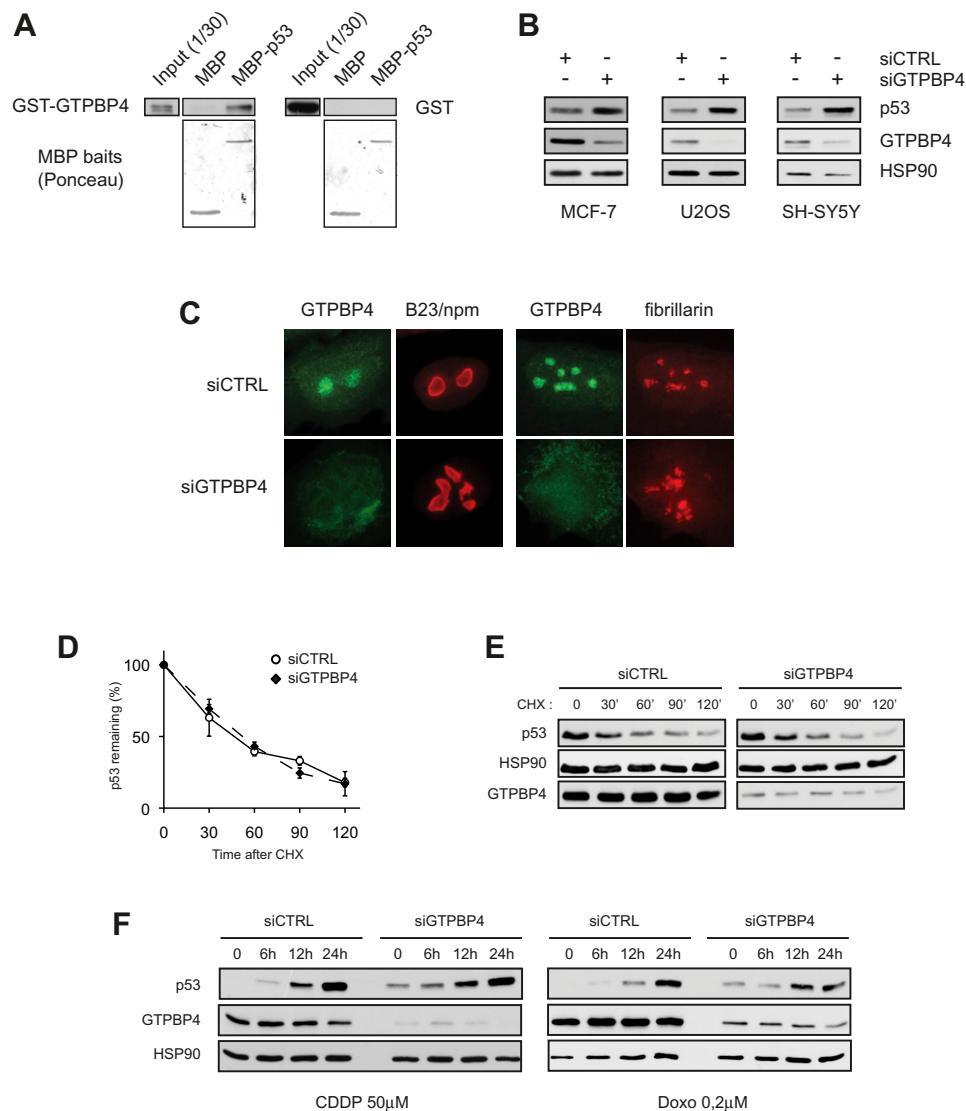

**Fig. S5.** Additional evidence of physical and functional interaction between GTPBP4 and p53. (A) Purified GTPBP4 and p53 interact in vitro. Recombinant GST and GST-GTPBP4 proteins were expressed in bacteria, purified on glutathione-Sepharose beads, eluted, and used for in vitro pull-down assays on amylose beads loaded with MBP or MBP-p53 purified from transfected H1299 cells (*SI Methods*). GST-GTPBP4 is produced with poor efficiency in bacteria, so the protein was detected by immunoblotting. (Upper) GST-GTPBP4 (Left) or GST (Right) proteins copurified with MBP or MBP-p53 beads, compared to 1/30th of the input. (Lower) Affinity-purified MBP baits. (B) Knockdown of GTPBP4 induces accumulation of p53 in multiple cell lines. p53 expression was analyzed by immunoblotting of the indicated human transformed cells after transfection of control or GTPBP4 siRNA. A specific antibody to GTPBP4 confirmed efficient knockdown of the endogenous protein. Hsp90 was detected in the same lysates as a loading control. (C) GTPBP4 knockdown does not affect localization of key nucleolar proteins. Immunofluorescence analysis is shown of GTPBP4, B23/nucleophosmin, and fibrillarlin in U2OS cells transfected for 48 h with either control or GTPBP4 siRNA. Nuclei are counterstained with Hoechst. (D) GTPBP4 knockdown does not induce p53 stabilization. Quantification is shown of the ratio of p53 to Hsp90 (measured by densitometry on Western blots) in HCT116 WT cells transfected with GTPBP4 siRNA (solid diamonds) or control siRNA (open circles) for 48 h and treated for the indicated times with 50  $\mu$ M Cycloheximide (CHX). Data are means  $\pm$  SD for three independent experiments. (E) Representative Western blot used for the analysis of p53 half-life. To obtain a comparable p53 signal, the gel was loaded with 15  $\mu$ g lysate of control siRNA samples (Left), and 7.5  $\mu$ g lysate of GTPBP4 knockdown samples (Right). Immunoblotting for GTPBP4 confirmed efficient knockdown of the endogenous protein. (F) Depletion of GTPBP4 does not impair p53 accumulation in response to DNA damage. HCT116 WT cells were transfected with GTPBP4 siRNA or control siRNA for 48 h and treated for the indicated times with Cisplatin (CDDP) or Doxorubicin. The same amount of total lysate was loaded in all lanes. Blotting for GTPBP4 confirmed efficient knockdown of the endogenous protein. Hsp90 was detected in the same lysates as a loading control.

**Table S1. List of Dmp53 interactors identified in the screening (IVDI)**

| DGC clone | FlyBase ID  | Gene    | Name                                           |
|-----------|-------------|---------|------------------------------------------------|
| 01K10     | FBgn0003514 | CG3595  | SPAGHETTI SQUASH                               |
| 01N03     | FBgn0038876 | CG5919  | CG5919                                         |
| 02I02     | FBgn0025463 | CG4303  | BRAHMA ASSOCIATED PROTEIN 60KD                 |
| 02K16     | FBgn0034091 | CG8448  | MRJ                                            |
| 02K24     | FBgn0036194 | CG11652 | CG11652                                        |
| 02M23     | FBgn0010173 | CG9633  | REPLICATION PROTEIN A 70 (*)                   |
| 03B09     | FBgn0014455 | CG11654 | ADENOSYLHOMOCYSTEINASE AT 13                   |
| 03B22     | FBgn0013773 | CG10240 | CYP6A22                                        |
| 03C13     | FBgn0037814 | CG6325  | CG6325                                         |
| 03G23     | FBgn0087035 | CG7439  | ARGONAUTE 2 (partial)                          |
| 03K05     | FBgn0011768 | CG6598  | FORMALDEHYDE DEHYDROGENASE                     |
| 03K16     | FBgn0045063 | CG8824  | FUSED LOBES                                    |
| 03K24     | FBgn0032690 | CG10333 | CG10333 (partial)                              |
| 04M20     | FBgn0000099 | CG8376  | APTEROUS                                       |
| 05C12     | FBgn0027532 | CG7139  | CG7139                                         |
| 05C15     | FBgn0021944 | CG3433  | COPROPORPHYRINOGEN OXIDASE                     |
| 05D12     | FBgn0035600 | CG4769  | CG4769                                         |
| 05G11     | FBgn0028530 | CG18124 | MITOCHONDRIAL TRANSCRIPTION TERMINATION FACTOR |
| 05H10     | FBgn0023519 | CG3109  | MITOCHONDRIAL RIBOSOMAL PROTEIN L16            |
| 05H12     | FBgn0038487 | CG4060  | TWEEDLEW                                       |
| 05I12     | FBgn0000146 | CG6137  | AUBERGINE                                      |
| 05I24     | FBgn0028473 | CG8801  | CG8801                                         |
| 05N04     | FBgn0016041 | CG12157 | TRANSLOCASE OF OUTER MEMBRANE 40               |
| 05N16     | FBgn0029969 | CG10932 | CG10932                                        |
| 06K11     | FBgn0038194 | CG3050  | CYP6D5                                         |
| 07C11     | FBgn0037544 | CG11035 | CG11035                                        |
| 07C17     | FBgn0029094 | CG9383  | ANTI-SILENCING FACTOR 1                        |
| 07I12     | FBgn0033438 | CG1794  | MATRIX METALLOPROTEINASE 2                     |
| 07N13     | FBgn0010340 | CG9852  | UPSTREAM OF RPII140                            |
| 08D07     | FBgn0001133 | CG33133 | GRAUZONE                                       |
| 08K22     | FBgn0038546 | CG7379  | CG7379 (*)                                     |
| 08N19     | FBgn0033235 | CG8728  | CG8728                                         |
| 09C09     | FBgn0019650 | CG11186 | TWIN OF EYELESS                                |
| 09M03     | FBgn0031191 | CG14617 | CG14617                                        |
| 10N07     | FBgn0037245 | CG14648 | GROWL                                          |
| 11D05     | FBgn0000351 | CG11330 | CORTEX                                         |
| 12A20     | FBgn0001222 | CG5748  | HEAT-SHOCK FACTOR                              |
| 12C03     | FBgn0066365 | CG15013 | DUSKY-LIKE (partial)                           |
| 12C07     | FBgn0035852 | CG7387  | CG7387                                         |
| 12C18     | FBgn0037250 | CG1074  | CG1074                                         |
| 12E10     | FBgn0050059 | CG30059 | CG30059                                        |
| 12H10     | FBgn0033367 | CG8193  | CG8193                                         |
| 12H23     | FBgn0039654 | CG14514 | BRD8                                           |
| 13B16     | FBgn0038860 | CG10825 | CG10825                                        |
| 13B17     | FBgn0036397 | CG8783  | CG8783                                         |
| 14C01     | FBgn0038607 | CG7669  | CG7669                                         |
| 14M15     | FBgn0026238 | CG2944  | GUSTAVUS                                       |
| 15D22     | FBgn0052627 | CG32627 | CG32627                                        |
| 15E14     | FBgn0020616 | CG3423  | STROMALIN                                      |
| 15E20     | FBgn0035416 | CG17569 | GRYZUN                                         |
| 15E23     | FBgn0032388 | CG6686  | CG6686                                         |
| 15K05     | FBgn0031820 | CG9537  | DAXX-LIKE PROTEIN (partial) (*)                |
| 15K06     | FBgn0000140 | CG6875  | ABNORMAL SPINDLE (partial)                     |
| 15K10     | FBgn0051108 | CG31108 | CG31108                                        |
| 15M01     | FBgn0052306 | CG32306 | CG32306                                        |
| 15M17     | FBgn0037705 | CG9381  | MURASHKA                                       |
| 16A07     | FBgn0000504 | CG11094 | DOUBLESEX                                      |
| 16A15     | FBgn0003721 | CG4898  | TROPOMYOSIN 1                                  |
| 16F15     | FBgn0024987 | CG3056  | CG3056                                         |
| 16K04     | FBgn0030235 | CG1691  | IGF-II MRNA-BINDING PROTEIN                    |
| 16K11     | FBgn0029764 | CG3249  | YU                                             |
| 16P06     | FBgn0051738 | CG31738 | CG31738                                        |
| 17C04     | FBgn0032679 | CG10302 | BICOID STABILITY FACTOR                        |



**Table S1. Cont.**

| DGC clone | FlyBase ID  | Gene    | Name                             |
|-----------|-------------|---------|----------------------------------|
| 17C05     | FBgn0259165 | CG42270 | CG42270                          |
| 17C12     | FBgn0032129 | CG4405  | JUNCTOPHILIN                     |
| 17C13     | FBgn0002872 | CG1960  | MUTATOR 2                        |
| 17C16     | FBgn0021760 | CG32435 | CHROMOSOME BOWS                  |
| 2_11C13   | FBgn0038266 | CG3610  | CG3610                           |
| 2_11G15   | FBgn0050418 | CG30418 | NORD (partial)                   |
| 2_11G21   | FBgn0034532 | CG13436 | CG13436                          |
| 2_11H15   | FBgn0037101 | CG7634  | CG7634                           |
| 2_11J23   | FBgn0034007 | CG8102  | CG8102                           |
| 2_11N09   | FBgn0033258 | CG8712  | CG8712                           |
| 2_12F05   | FBgn0031546 | CG8851  | CG8851 (partial)                 |
| 2_12G16   | FBgn0029667 | CG14271 | GROWTH ARREST SPECIFIC PROTEIN 8 |
| 2_12I11   | FBgn0037454 | CG1137  | CG1137                           |
| 2_12I15   | FBgn0033953 | CG12861 | CG12861                          |
| 2_12K16   | FBgn0037626 | CG8236  | CG8236                           |
| 2_12L20   | FBgn0036731 | CG6333  | CG6333                           |
| 2_13A23   | FBgn0039124 | CG13597 | CG13597 (partial)                |
| 2_13J13   | FBgn0033706 | CG13167 | CG13167                          |
| 2_13K20   | FBgn0039731 | CG15524 | SPINDLE ASSEMBLY ABNORMAL        |
| 2_14E02   | FBgn0029940 | CG1958  | CG1958                           |
| 2_14H06   | FBgn0033186 | CG1602  | CG1602                           |
| 2_14H24   | FBgn0000996 | CG8171  | DOUBLE PARKED                    |
| 2_14M21   | FBgn0050362 | CG30362 | CG30362                          |
| 2_14M24   | FBgn0001250 | CG9623  | INFLATED (partial)               |
| 2_15N05   | FBgn0034037 | CG8214  | CG8214                           |
| 2_15O05   | FBgn0036273 | CG10426 | CG10426                          |
| 2_16G03   | FBgn0032781 | CG9987  | CG9987                           |
| 2_16M06   | FBgn0052985 | CG32985 | CG32985 (partial)                |
| 2_16M16   | FBgn0015542 | CG7951  | SIMILAR (partial)*               |

\*Known Dmp53 interactors and fly orthologs of mammalian proteins already reported to bind p53, p63, or p73 (FlyBase version FB2008\_5, released May 30, 2008).

**Table S2. List of known Dmp53 interactors (LCDI)**

| FlyBase ID  | Gene     | Name                 | Ref.   |
|-------------|----------|----------------------|--------|
| FBgn0053554 | CG33554  | <i>nipped-A</i>      | (1)    |
| FBgn0020388 | CG4107   | <i>Gcn5/PCAF</i>     | (1)    |
| FBgn0030891 | CG7098   | <i>diskette</i>      | (1)    |
| FBgn0037555 | CG9638   | <i>Ada2b</i>         | (1)    |
| FBgn0000044 | CG10067  | <i>Act57B</i>        | (2)    |
| FBgn0000166 | CG1034   | <i>bicoid</i>        | (2)    |
| FBgn0010602 | CG3018   | <i>lesswright*</i>   | (2)    |
| FBgn0003479 | CG7948   | <i>Spindle-A*</i>    | (2)    |
| FBgn0023526 | CG2865   | <i>CG2865</i>        | (2)    |
| FBgn0025674 | CG15218  | <i>CycK</i>          | (2)    |
| FBgn0026602 | CG1851   | <i>Ady43A</i>        | (2)    |
| FBgn0030459 | CG12723  | <i>CG12723</i>       | (2)    |
| FBgn0030882 | CG6835   | <i>GS</i>            | (2)    |
| FBgn0031894 | CG4496   | <i>CG4496</i>        | (2)    |
| FBgn0031957 | CG14534  | <i>TwdlE</i>         | (2)    |
| FBgn0028509 | CG31811  | <i>cenG1A</i>        | (2)    |
| FBgn0023091 | CG8667   | <i>dimmed</i>        | (2)    |
| FBgn0035021 | CG4622   | <i>CG4622</i>        | (2)    |
| FBgn0035357 | CG1244   | <i>CG1244</i>        | (2, 3) |
| FBgn0035397 | CG11486  | <i>CG11486</i>       | (2)    |
| FBgn0035641 | CG5568   | <i>CG5568</i>        | (2)    |
| FBgn0037944 | CG6923   | <i>CG6923</i>        | (2, 3) |
| FBgn0034410 | CG15104* | <i>dTopors*</i>      | (3, 4) |
| FBgn0000633 | CG17716  | <i>faint sausage</i> | (3)    |
| FBgn0003891 | CG9450   | <i>tudor</i>         | (3)    |
| FBgn0010328 | CG5965   | <i>woc</i>           | (3)    |
| FBgn0011474 | CG3307   | <i>pr-set7</i>       | (3)    |
| FBgn0012049 | CG11494  | <i>BtbVII</i>        | (3)    |
| FBgn0026262 | CG2009   | <i>bip2/DmTAF3</i>   | (3, 5) |
| FBgn0027499 | CG12340  | <i>CG12340</i>       | (3)    |
| FBgn0027514 | CG1024   | <i>CG1024</i>        | (3)    |
| FBgn0027603 | CG12359  | <i>Ulp1</i>          | (3)    |
| FBgn0031597 | CG17612  | <i>CG17612</i>       | (3)    |
| FBgn0031719 | CG18269  | <i>CG18269</i>       | (3)    |
| FBgn0033636 | CG10897  | <i>toutatis</i>      | (3)    |
| FBgn0034976 | CG4049   | <i>CG4049</i>        | (3)    |
| FBgn0035038 | CG13588  | <i>CG13588</i>       | (3)    |
| FBgn0035047 | CG3691   | <i>Pof</i>           | (3)    |
| FBgn0035849 | CG7404   | <i>ERR</i>           | (3)    |
| FBgn0036668 | CG9715   | <i>CG9715</i>        | (3)    |
| FBgn0037344 | CG2926   | <i>CG2926</i>        | (3)    |
| FBgn0037643 | CG11963  | <i>CG11963</i>       | (3)    |
| FBgn0039923 | CG1793   | <i>MED26</i>         | (3)    |
| FBgn0053208 | CG33208  | <i>MICAL</i>         | (3)    |
| FBgn0250754 | CG42232  | <i>CG42232</i>       | (3)    |
| FBgn0036622 | CG4753   | <i>CG4753</i>        | (6)    |
| FBgn0031820 | CG9537   | <i>DLP*</i>          | (7)    |
| FBgn0031129 | CG1324   | <i>CG1324</i>        | (8)    |

\*Orthologs of mammalian proteins already reported to bind p53, p63, or p73.

1. Kusch T, Guelman S, Abmayr SM, Workman JL (2003) Two *Drosophila* Ada2 homologues function in different multiprotein complexes. *Mol Cell Biol* 23:3305–3319.
2. Stanyon CA, et al. (2004) A *Drosophila* protein-interaction map centered on cell-cycle regulators. *Genome Biol* 5:R96.
3. Formstecher E, et al. (2005) Protein interaction mapping: A *Drosophila* case study. *Genome Res* 15:376–384.
4. Secombe J, Parkhurst SM (2004) *Drosophila* Topors is a RING finger-containing protein that functions as a ubiquitin-protein isopeptide ligase for the hairy basic helix-loop-helix repressor protein. *J Biol Chem* 279:17126–17133.
5. Bereczki O, et al. (2008) TATA binding protein associated factor 3 (TAF3) interacts with p53 and inhibits its function. *BMC Mol Biol* 9:57.
6. Giot L, et al. (2003) A protein interaction map of *Drosophila melanogaster*. *Science* 302:1727–1736.
7. Bodai L, et al. (2007) Daxx-like protein of *Drosophila* interacts with Dmp53 and affects longevity and Ark mRNA level. *J Biol Chem* 282:36386–36393.
8. *Droid* (V4.0), available at <http://www.droidb.org/>.

**Table S3. Enrichment analysis of gene ontology (GO) definitions and phenotypes in the IVDI dataset**

| GO or phenotype ID | Description                                              | No. of genes | Expected | P value    |
|--------------------|----------------------------------------------------------|--------------|----------|------------|
| GO:0007279 (BP)    | Pole cell formation                                      | 4            | 0.15     | $<10^{-4}$ |
| GO:0007277 (BP)    | Pole cell development                                    | 4            | 0.18     | $<10^{-4}$ |
| GO:0003704 (MF)    | Specific RNA polymerase II transcription factor activity | 5            | 0.53     | $<10^{-3}$ |
| GO:0007282 (BP)    | Cystoblast division                                      | 3            | 0.15     | $<10^{-3}$ |
| GO:0007276 (BP)    | Gamete generation                                        | 13           | 4.41     | $<10^{-3}$ |
| GO:0019953 (BP)    | Sexual reproduction                                      | 13           | 4.54     | $<10^{-3}$ |
| GO:0007349 (BP)    | Cellularization                                          | 5            | 0.68     | $<10^{-3}$ |
| GO:0045143 (BP)    | Homologous chromosome segregation                        | 2            | 0.04     | $<10^{-3}$ |
| GO:0000922 (CC)    | Spindle pole                                             | 3            | 0.19     | $<10^{-3}$ |
| GO:0009994 (BP)    | Oocyte differentiation                                   | 6            | 1.14     | $<10^{-3}$ |
| FBcv0000366        | Female sterile                                           | 12           | 4.08     | 0.00069    |
| FBcv0000364        | Sterile                                                  | 13           | 5.43     | 0.0027     |
| FBcv0000435        | Neuroanatomy defective                                   | 10           | 4.26     | 0.0097     |
| FBcv0000433        | Cytokinesis defective                                    | 3            | 0.51     | 0.014      |
| FBcv0000398        | Memory defective                                         | 3            | 0.63     | 0.024      |
| FBcv0000397        | Learning defective                                       | 2            | 0.32     | 0.040      |
| FBcv0000370        | Male sterile                                             | 5            | 2.00     | 0.049      |

BP, biological process; CC, cell compartment; MF, molecular function.

**Table S4. Manually curated list of human orthologs of Dmp53 interactors identified during the screening**

| <i>Drosophila</i> gene             | Human ortholog(s)*                                |                                                                                               |
|------------------------------------|---------------------------------------------------|-----------------------------------------------------------------------------------------------|
|                                    | Gene symbol                                       | Definition                                                                                    |
|                                    | Regulation of transcription and chromatin binding |                                                                                               |
| HEAT SHOCK FACTOR                  | HSF1, HSF2, HSF4                                  | Heat-shock transcription factor 1, 2, 4                                                       |
| APTEROUS                           | LHX2                                              | LIM homeobox 2                                                                                |
| TWIN OF EYELESS                    | PAX6                                              | Paired box 6                                                                                  |
| ANTI-SILENCING FACTOR 1<br>CG14514 | ASF1A, ASF1B<br>BRD8                              | ASF1 anti-silencing function 1 homolog A, B<br>Bromodomain containing 8                       |
|                                    | Chaperones                                        |                                                                                               |
| CG7387                             | DNAJA3                                            | DnaJ (Hsp40) homolog, A3                                                                      |
| MRJ                                | DNAJB6                                            | DnaJ (Hsp40) homolog, B6                                                                      |
| CG11035                            | DNAJC30                                           | DnaJ (Hsp40) homolog, C30                                                                     |
|                                    | RNA binding and processing                        |                                                                                               |
| YU                                 | AKAP1                                             | A kinase (PRKA) anchor protein 1                                                              |
| CG10333                            | DDX23                                             | DEAD (Asp-Glu-Ala-Asp) box polypeptide 23                                                     |
| IGF-II MRNA-BINDING<br>PROTEIN     | IGF2BP1,<br>IGF2BP2,<br>IGF2BP3                   | Insulin-like growth factor 2 mRNA binding<br>protein 1, 2, 3                                  |
| BICOID STABILITY FACTOR<br>GROWL   | LRPPRC<br>MTHFSD                                  | Leucine-rich PPR-motif containing<br>Methenyltetrahydrofolate synthetase<br>domain containing |
| AGO2                               | EIF2C1,<br>EIF2C2,<br>EIF2C3,<br>EIF2C4           | Argonaute 1, 2, 3, 4                                                                          |
| AUBERGINE                          | PIWIL1,<br>PIWIL2,<br>PIWIL3                      | Piwi-like 1, 2, 3                                                                             |
|                                    | Cell cycle                                        |                                                                                               |
| DOUBLE PARKED                      | CDT1                                              | Chromatin licensing and DNA replication<br>factor 1                                           |
| STROMALIN                          | STAG1,<br>STAG2                                   | Stromal antigen 1, 2                                                                          |
|                                    | Centrosomes and cytoskeleton                      |                                                                                               |
| ABNORMAL SPINDLE                   | ASPM                                              | asp (abnormal spindle) homolog,<br>microcephaly associated                                    |
| CHROMOSOME BOWS                    | CLASP1                                            | Cytoplasmic linker associated protein 1                                                       |
| SPINDLE ASSEMBLY ABNORMAL 6        | SASS6                                             | Spindle assembly 6 homolog                                                                    |
| SPAGHETTI SQUASH                   | MYL9                                              | Myosin, light chain 9, regulatory                                                             |
| TROPOMYOSIN 1                      | TPM3                                              | Tropomyosin 3                                                                                 |
|                                    | Enzymatic activity                                |                                                                                               |
| FORMALDEHYDE<br>DEHYDROGENASE      | ADH5                                              | Alcohol dehydrogenase 5 (class III)                                                           |
| ADENOSYLHOMOCYSTEINASE<br>AT 13    | AHCY                                              | S-adenosylhomocysteine hydrolase                                                              |
| CG11652                            | DPH1                                              | DPH1 homolog, OVCA1                                                                           |
| CG10426                            | INPP5E                                            | Inositol polyphosphate-5-phosphatase, 72<br>kDa                                               |
| CG1074                             | TRMT11                                            | tRNA methyltransferase 11 homolog                                                             |
| CG31108                            | TLL5                                              | Tubulin tyrosine ligase-like family member 5                                                  |
|                                    | Various                                           |                                                                                               |
| CG32627                            | AGBL2,<br>AGBL3                                   | ATP/GTP binding protein-like 2, 3                                                             |
| CG32560                            | DAB2IP,<br>RASAL2                                 | DAB2 interacting protein, RAS protein<br>activator-like 2                                     |
| GAS8                               | GAS8                                              | Growth arrest-specific 8                                                                      |
| CG8801                             | GTPBP4                                            | GTP binding protein 4                                                                         |
| JUNCTOPHILIN                       | JPH1, JPH2,<br>JPH3                               | Junctophilin 1, 2, 3                                                                          |
| CG7139                             | N4BP2                                             | NEDD4 binding protein 2                                                                       |
| MURASHKA                           | RNF38, RNF44                                      | Ring finger protein 38, 44                                                                    |

Table S4. Cont.

| <i>Drosophila</i> gene        | Human ortholog(s)*                                         |                                                                                                         |
|-------------------------------|------------------------------------------------------------|---------------------------------------------------------------------------------------------------------|
|                               | Gene symbol                                                | Definition                                                                                              |
| CG6686                        | SART1                                                      | Squamous cell carcinoma antigen recognized by T cells                                                   |
| GUSTAVUS                      | SPSB1, SPSB4                                               | splA/ryanodine receptor domain and SOCS box containing 1, 4                                             |
|                               | Unknown                                                    |                                                                                                         |
| GRYZUN                        | C4orf41                                                    |                                                                                                         |
| CG13436                       | C6orf165                                                   |                                                                                                         |
| CG8783                        | C16orf35                                                   |                                                                                                         |
| CG9987                        | C22orf28                                                   |                                                                                                         |
|                               | p53 interologs                                             |                                                                                                         |
| DAXX-LIKE PROTEIN             | DAXX                                                       | Death-associated protein 6                                                                              |
| SIMILAR                       | HIF1A                                                      | Hypoxia-inducible factor 1, alpha subunit                                                               |
| CG7379                        | ING1,ING2                                                  | Inhibitor of growth family, member 1, 2                                                                 |
| REPLICATION PROTEIN A 70      | RPA1                                                       | Replication protein A1, 70 kDa                                                                          |
| BAP60                         | SMARCD1,<br>SMARCD2,<br>SMARCD3                            | SWI/SNF related, matrix associated, actin-dependent regulator of chromatin, subfamily D, member 1, 2, 3 |
|                               | Mitochondrial                                              |                                                                                                         |
| CG10932                       | ACAT1                                                      | Acetyl-CoA acetyltransferase                                                                            |
| UPSTREAM OF RPII140           | C3orf1                                                     |                                                                                                         |
| COPROPORPHYRINOGEN OXIDASE    | CPOX                                                       | Coproporphyrinogen oxidase                                                                              |
| CG4769                        | CYC1                                                       | Cytochrome c-1                                                                                          |
| MITOCH. RIBOSOMAL PROTEIN L16 | MRPL16                                                     | Mitochondrial ribosomal protein L16                                                                     |
| CG8102                        | NDUFV1                                                     | NADH dehydrogenase (ubiquinone) flavoprotein 1                                                          |
| CG8728                        | PMPCA                                                      | Peptidase (mitochondrial processing) alpha                                                              |
| TOM40                         | TOMM40                                                     | Translocase of outer mitochondrial membrane 40 homolog                                                  |
|                               | Extracellular, intraorganelle, integral to plasma membrane |                                                                                                         |
| NORD                          | C4orf31                                                    | Unknown protein (contains N-terminal signal peptide)                                                    |
| CG31738                       | FNDC3A                                                     | Fibronectin type III domain containing 3A                                                               |
| CG30059                       | GNS                                                        | Glucosamine (N-acetyl)-6-sulfatase (Sanfilippo disease IIID)                                            |
| CG5919                        | IDI1                                                       | Isopentenyl-diphosphate delta isomerase 1                                                               |
| INFLATED                      | ITGA8, ITGAV                                               | Integrin alpha 8, alpha V                                                                               |
| MMP2                          | MMP17                                                      | Matrix metalloproteinase 17 (membrane-inserted)                                                         |

Databases: Homologene, version 62, released June 12, 2008; Inparanoid, version 6.0, updated August 2007; TreeFam, version 6.0, released June 6, 2008.

\*Orthologs were defined according to Homologene and Inparanoid databases, protein BLAST searches, and phylogenetic tree analysis.
